# Supplementary material for: Inhibition of angiogenesis in endothelial cells by Human Lysyl oxidase propeptide
Source: PubMed Central journal article supplement (PMC6041307; doi:10.1038/s41598-018-28745-8), 2018-07-11
Supplement: 41598_2018_28745_MOESM1_ESM.pdf [file 41598_2018_28745_MOESM1_ESM.pdf]

## **Supplementary Information for**

### **Inhibition of angiogenesis in endothelial cells by Human Lysyl oxidase propeptide**

Ragavachetty Nagaraj Nareshkumar<sup>1#</sup>, Konerirajapuram Natarajan Sulochana<sup>1</sup> and  
Karunakaran Coral <sup>1\*</sup>

<sup>1</sup>R.S. Mehta Jain Department of Biochemistry and Cell Biology, Vision Research Foundation, 41,  
College road, Chennai, India.

<sup>#</sup>School of Chemical and Biotechnology, SASTRA University, Thanjavur, India

Corresponding author: Karunakaran Coral

\*Email id: ceeyem08@gmail.com



## Supplementary Figure S2

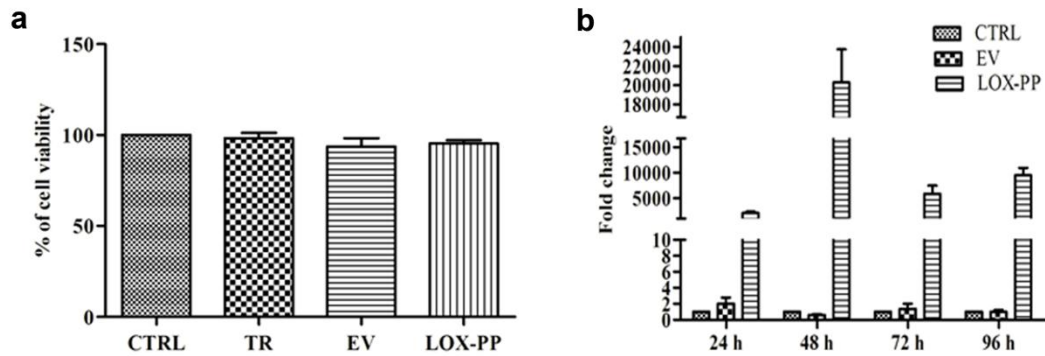

**Supplementary Figure S2 Cell cytotoxicity assay:** (a) LOX-PP overexpressed using transient transfection of LOX-PP construct in pcDNA 3.1(+)/HisA with Transfection Reagent (TR). The cells were also transfected with empty vector (EV), which was used as control. The cytotoxicity was quantified using MTT [3-(4,5-Dimethylthiazol-2-yl)-2,5-Diphenyltetrazolium Bromide] assay. (b) mRNA expression of LOX-PP upon overexpression of LOX-PP - Bar graph represents the fold change of LOX-PP in control, empty vector transfected and LOX-PP overexpressed HUVECs at 24, 48, 72 and 96 h post transfection. Values were expressed as mean  $\pm$  SD, n=3.

### Supplementary Figure S3

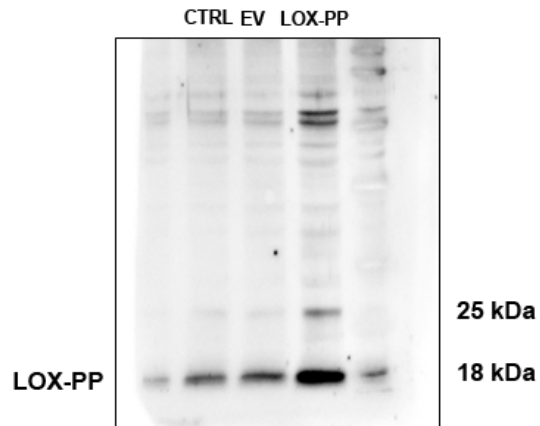

### Supplementary Figure S3:

After 48 h of transfection, HUVEC cell extracts were collected and probed using LOX-PP antibody by western blot (CTRL – Control; EV- empty vector; LOX-PP –LOX-PP transfected cells). **This represents the full-length blot of figure 2b.**

## Supplementary Figure S4

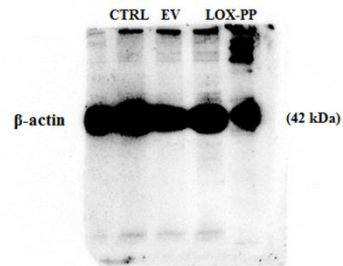

**Supplementary Figure S4:** After 48 h of transfection, cell extracts were collected and probed using  $\beta$ - actin as internal control (CTRL – Control; EV- empty vector; LOX-PP – LOX-PP transfected cells). **This represents the full-length blot of figure 2b.**

## Supplementary Figure S5

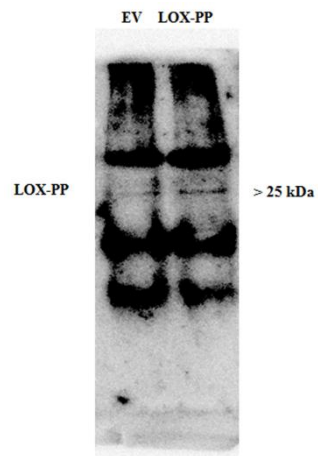

**Supplementary Figure S5:** Conditioned medium was collected and it was immunoprecipitated using LOX-PP antibody, immunoprecipitated samples were subjected to western blotting using antibody against LOX-PP (EV- empty vector; LOX-PP –LOX-PP transfected cells). **This represents the full-length blot of figure 2c**

## Supplementary Figure S6

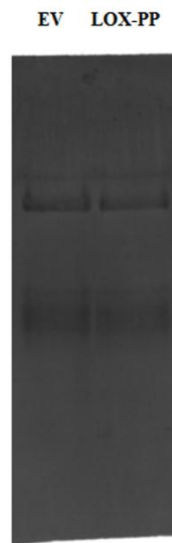

**Supplementary Figure S6:** Conditioned medium was collected and it was immunoprecipitated using LOX-PP antibody, immunoprecipitated samples were subjected to western blotting and coomassie staining of blot was considered as loading control. (EV-empty vector; LOX-PP –LOX-PP transfected cells). **This represents the full-length blot of figure 2c**

## Supplementary Figure S7

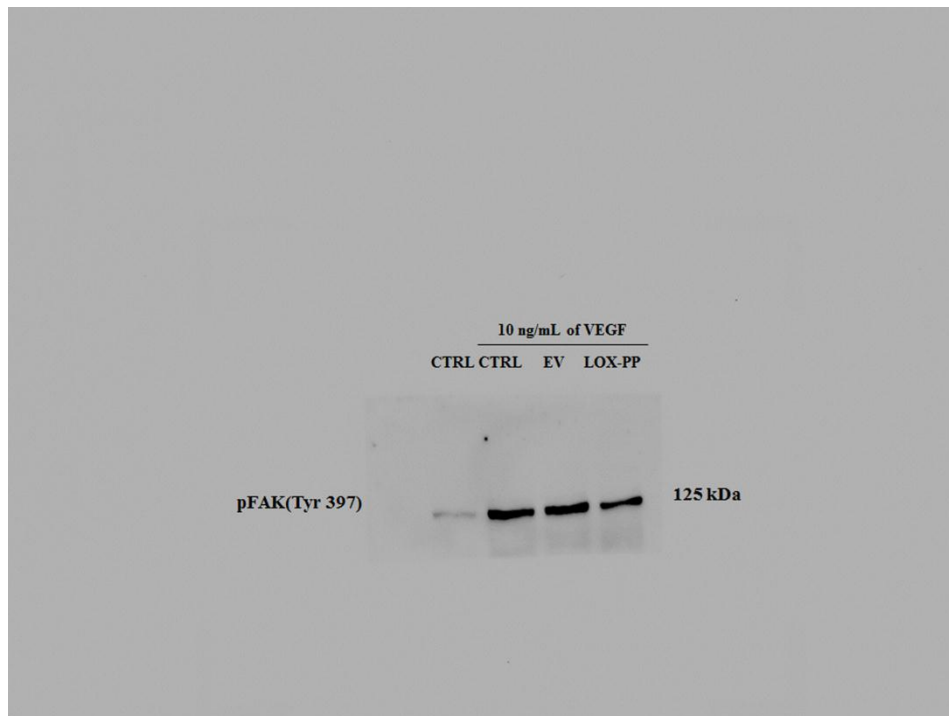

**Supplementary Figure S7:** HUVECs were transfected with LOX-PP and EV. After transfection, cells were treated with 10 ng/mL of VEGF for 15 min. Whole cell extract were prepared and sample were subjected to western blotting using antibodies against pFAK (Tyr397) (CTRL – Control; EV- empty vector; LOX-PP –LOX-PP transfected cells). **This represents the full-length blot of figure 9a for pFAK**



## Supplementary Figure S8

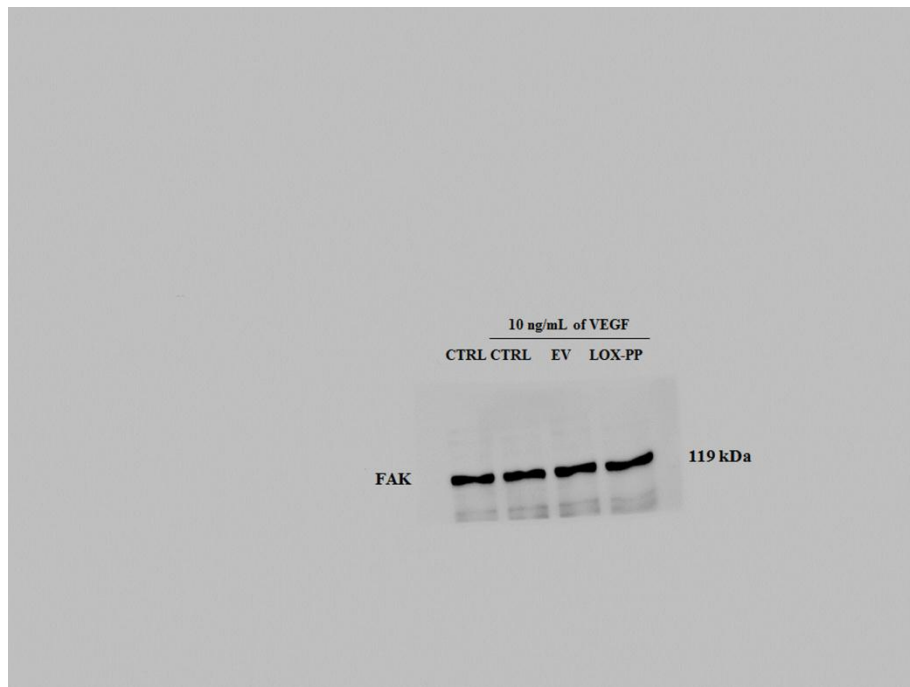

**Supplementary Figure S8:** HUVECs were transfected with LOX-PP and EV. After transfection, cells were treated with 10 ng/mL of VEGF for 15 min. Whole cell extract were prepared and sample were subjected to western blotting using total FAK. (CTRL – Control; EV- empty vector; LOX-PP –LOX-PP transfected cells). **This represents the full-length blot of figure 9a for Total FAK**

## Supplementary Figure S9

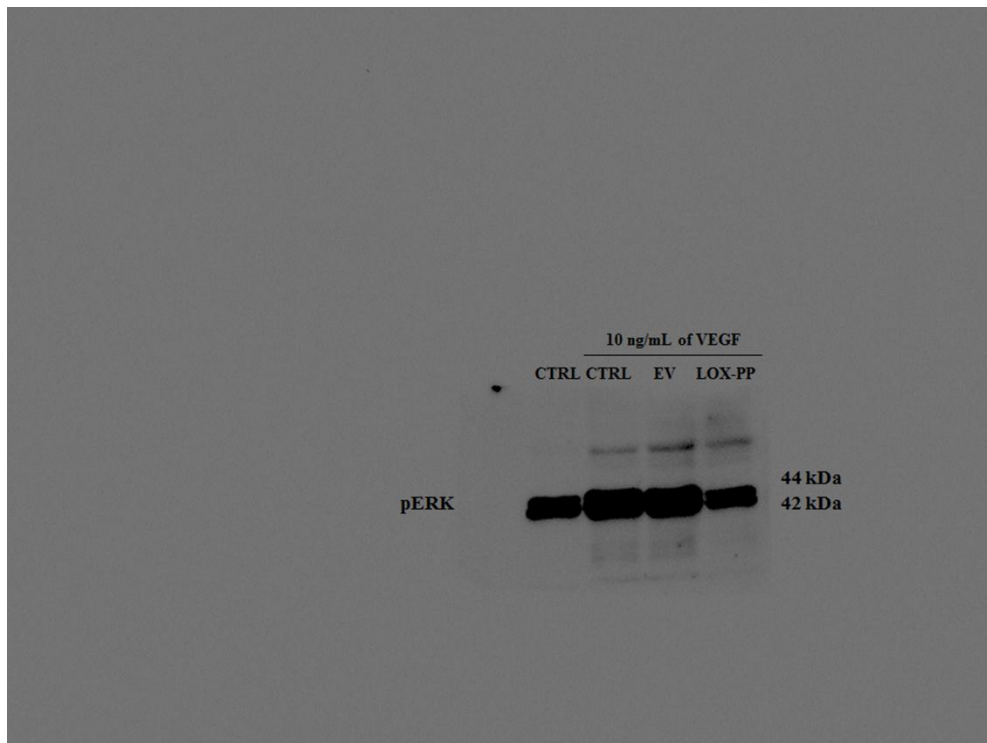

**Supplementary Figure S9:** HUVECs were transfected with LOX-PP and EV. After transfection, cells were treated with 10 ng/mL of VEGF for 15 min. Whole cell extract were prepared and sample were subjected to western blotting using antibodies against pERK (Thr202/Tyr204) (CTRL – Control; EV- empty vector; LOX-PP –LOX-PP transfected cells). **This represents the full-length blot of figure 9b for pERK**

## Supplementary Figure S10

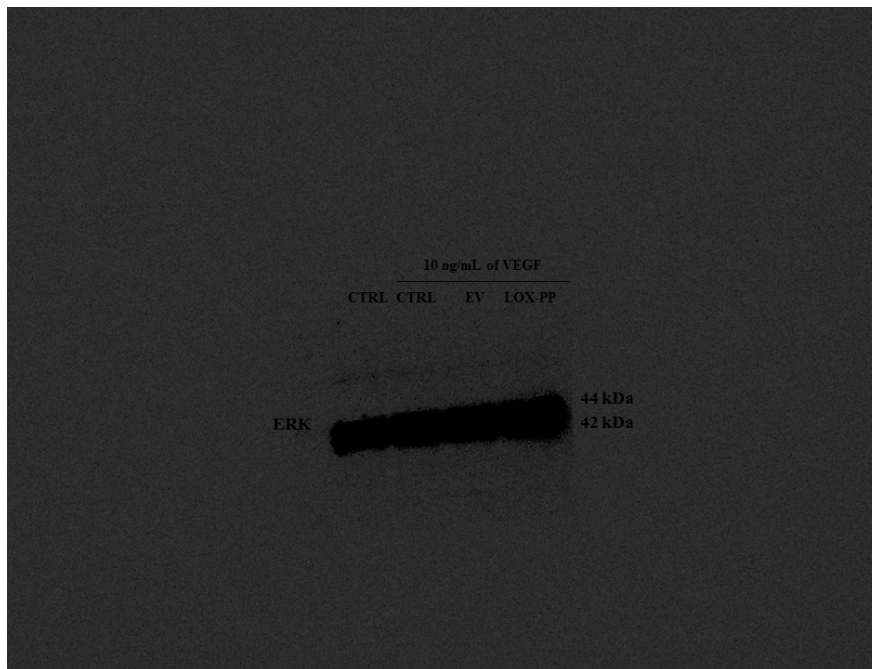

**Supplementary Figure S10:** HUVECs were transfected with LOX-PP and EV. After transfection, cells were treated with 10 ng/mL of VEGF for 15 min. Whole cell extract were prepared and sample were subjected to western blotting using antibodies against total ERK (CTRL – Control; EV- empty vector; LOX-PP –LOX-PP transfected cells). **This represents the full-length blot of figure 9b for Total ERK.**

## Supplementary Figure S11

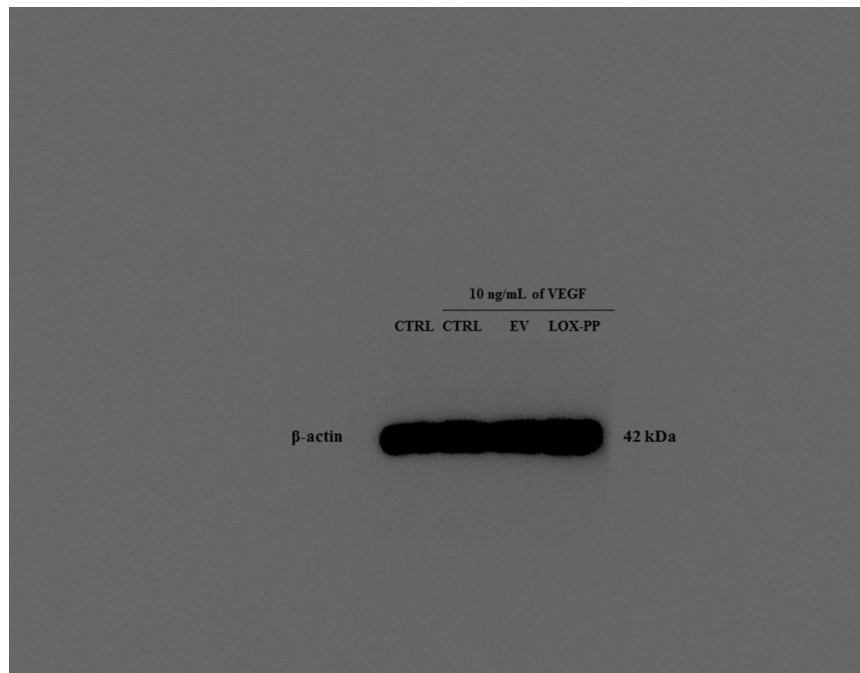

**Supplementary Figure S11:** HUVECs were transfected with LOX-PP and EV. After transfection, cells were treated with 10 ng/mL of VEGF for 15 min. Whole cell extract were prepared and sample were subjected to western blotting using  $\beta$ -actin as loading control. (CTRL – Control; EV- empty vector; LOX-PP –LOX-PP transfected cells). **This represents the full-length blots of  $\beta$ -actin for figure 9a and b**

## Supplementary Figure S12

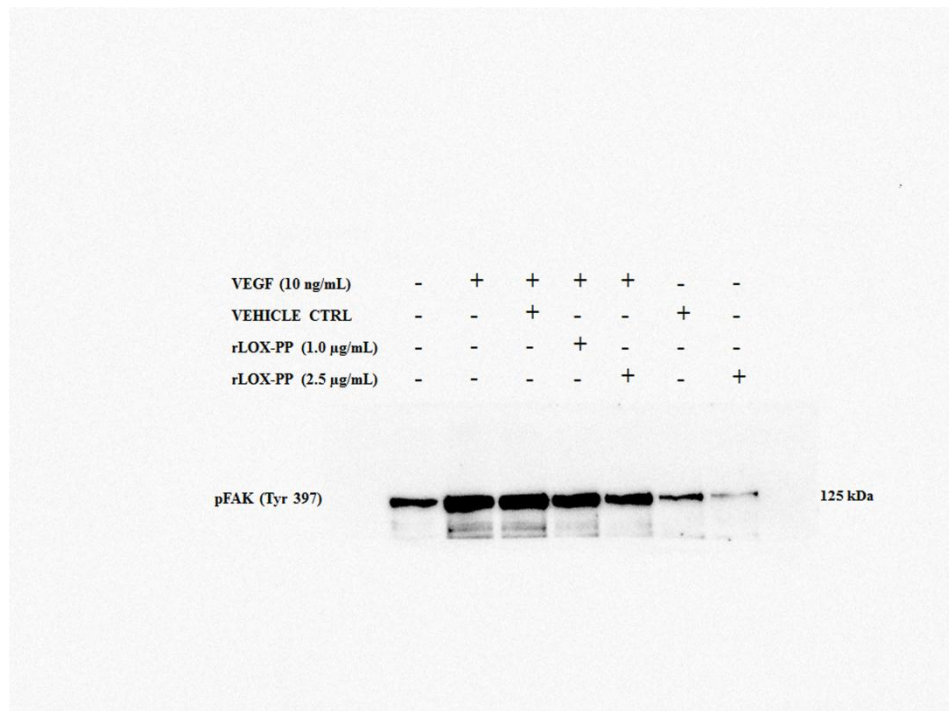

**Supplementary Figure S12:** HUVECs were treated with rLOX-PP and vehicle ctrl. After treatment, cells were treated with 10 ng/mL of VEGF for 15 min. Whole cell extract were prepared and sample were subjected to western blotting using antibodies against pFAK (Tyr397) (Vehicle ctrl – Vehicle control). **This represents the full-length blots of figure 10a & 10d for pFAK**

### Supplementary Figure S13

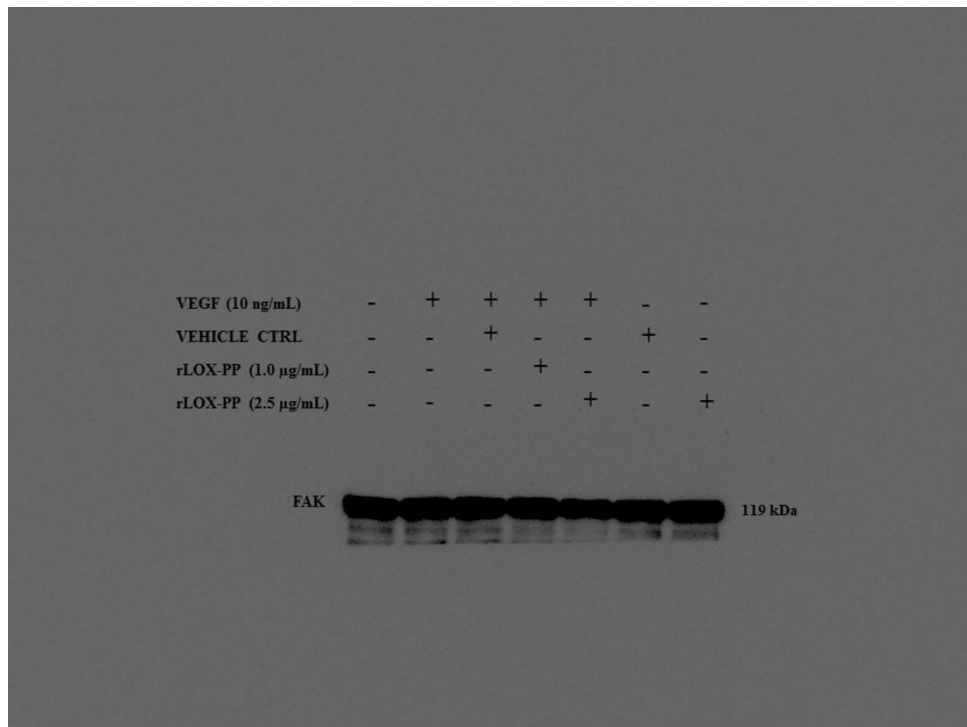

**Supplementary Figure S13:** HUVECs were treated with rLOX-PP and vehicle ctrl. After treatment, cells were treated with 10 ng/mL of VEGF for 15 min. Whole cell extract were prepared and sample were subjected to western blotting using antibodies against total FAK. (Vehicle ctrl – Vehicle control). **This represents the full-length blots of figure 10a & 10d for FAK**

### Supplementary Figure S14

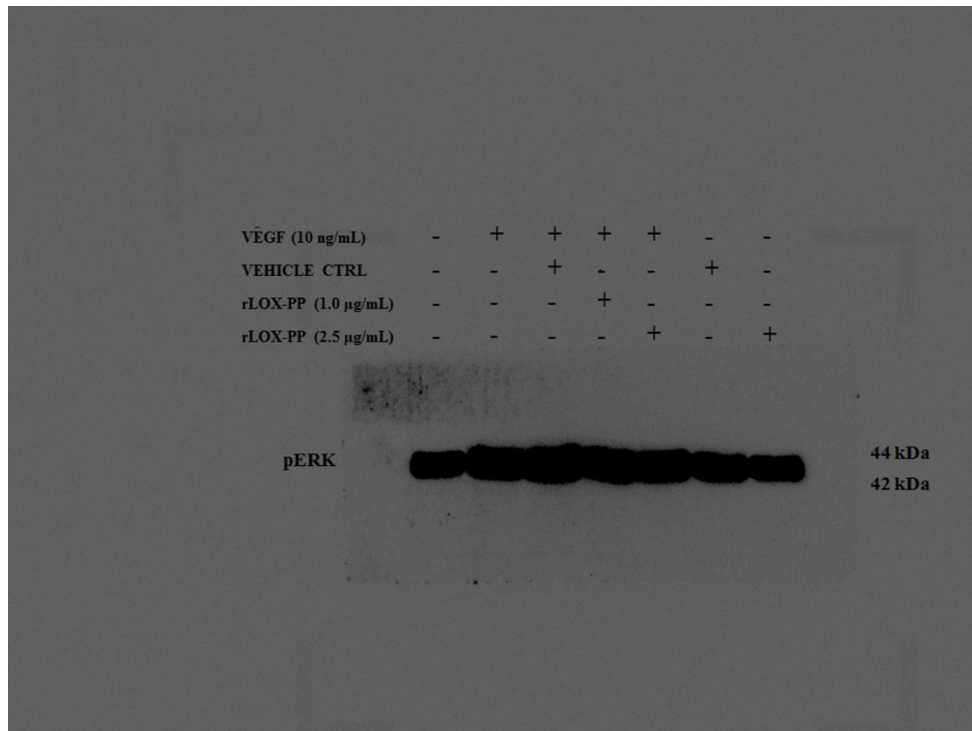

**Supplementary Figure S14:** HUVECs were treated with rLOX-PP and vehicle ctrl. After treatment, cells were treated with 10 ng/mL of VEGF for 15 min. Whole cell extract were prepared and sample were subjected to western blotting using antibodies against pERK (Thr202/Tyr204). (Vehicle ctrl – Vehicle control). **This represents the full-length blots of figure 10a & 10d for pERK**

### Supplementary Figure S15

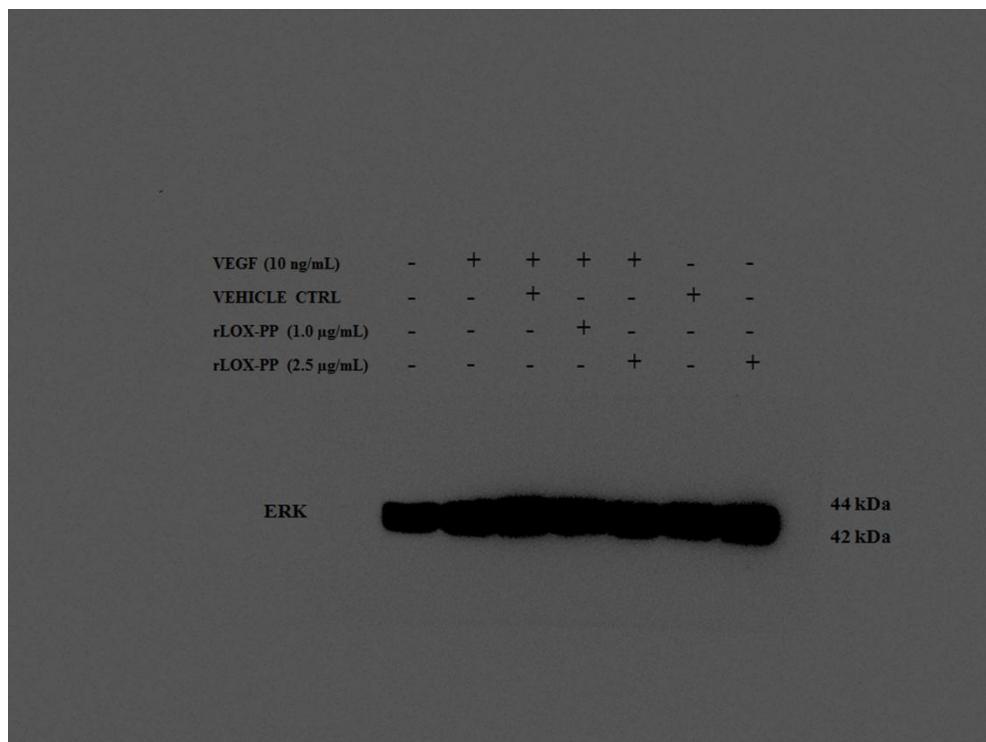

**Supplementary Figure S15:** HUVECs were treated with rLOX-PP and vehicle ctrl. After treatment, cells were treated with 10 ng/mL of VEGF for 15 min. Whole cell extract were prepared and sample were subjected to western blotting using antibodies against total ERK. (Vehicle ctrl – Vehicle control). **This represents the full-length blots of figure 10a & 10d for ERK.**



### Supplementary Figure S16

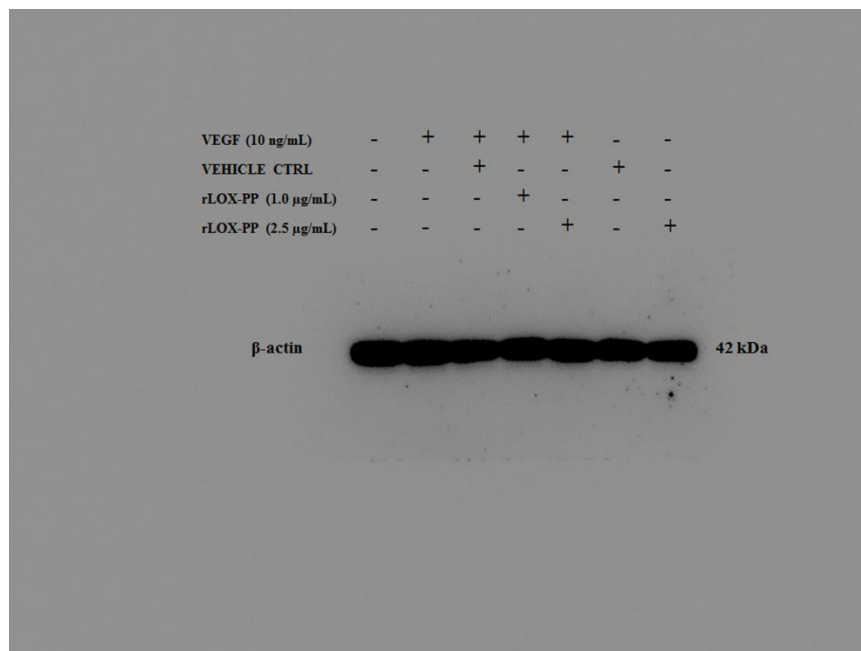

**Supplementary Figure S16:** HUVECs were treated with rLOX-PP and vehicle ctrl. After treatment, cells were treated with 10 ng/mL of VEGF for 15 min. Whole cell extract were prepared and sample were subjected to western blotting using  $\beta$ -actin which was used as loading control. (Vehicle ctrl – Vehicle control). **This represents the full-length blots of  $\beta$ -actin for figure 10a & 10d.**

**Supplementary Figure S17**

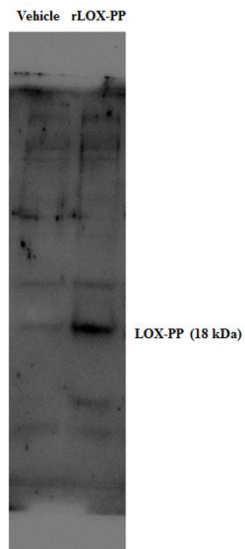

**Supplementary Figure S17:** Western blot of LOX-PP protein was increased upon addition of rLOX-PP in HUVECs when compared with vehicle ctrl (Vehicle ctrl – Vehicle control). **This represents the full-length blots of figure 12a for LOX-PP**

**Supplementary Figure S18**

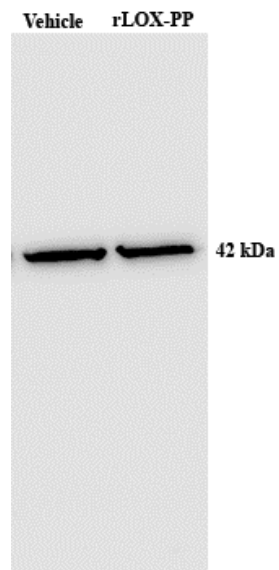

**Supplementary Figure S18:** Western blot of HUVECs cell lysate after addition of rLOX-PP showing  $\beta$ -actin used as loading control. (Vehicle ctrl – Vehicle control). **This represents the full-length blots of figure 12a for  $\beta$ -actin.**

**Supplementary Figure S19**

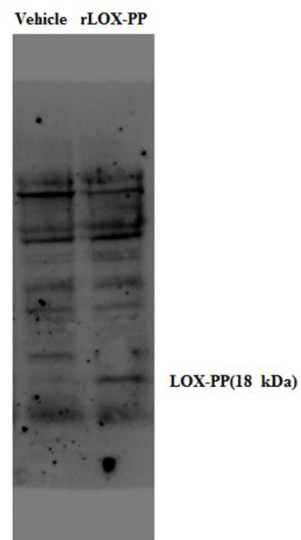

**Supplementary Figure S19:** Western blot for His-tag indicates rLOX-PP with His-tag which was added exogenously to HUVECs was found in the cell lysate indicating its uptake. **This represents the full-length blots of figure 12c for his-tag**

**Supplementary Figure S20**

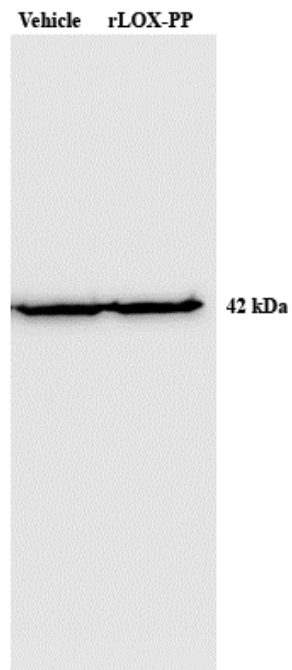

**Supplementary Figure S20:** Western blot of HUVECs cell lysate after addition of rLOX-PP with His-tag showing  $\beta$ -actin used as loading control. (Vehicle ctrl – Vehicle control). **This represents the full-length blots of figure 12c for  $\beta$ -actin.**

## Supplementary Figure S21

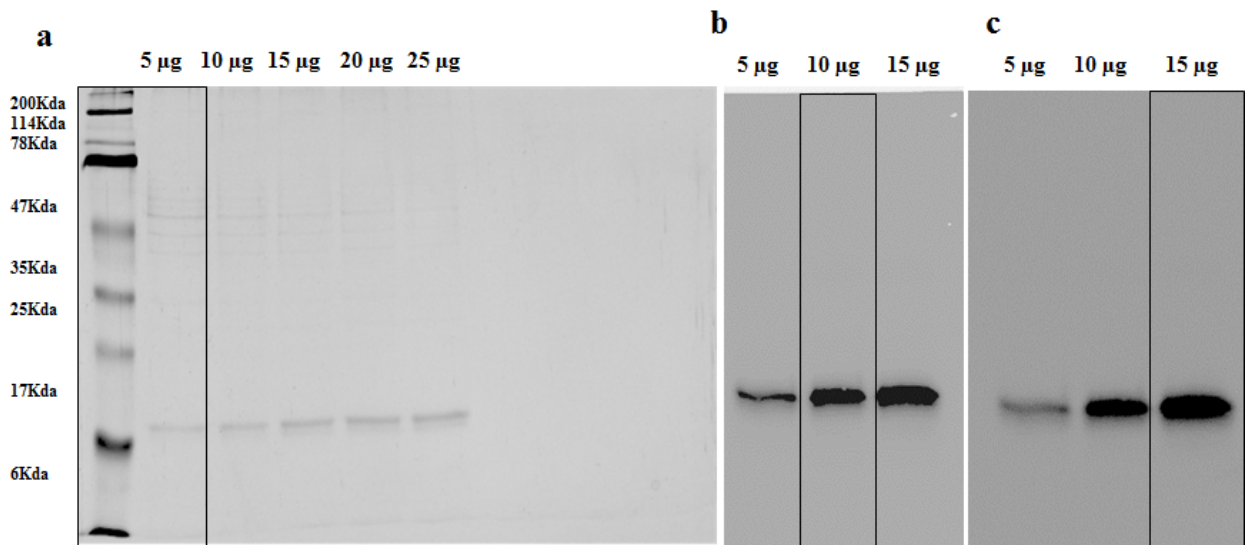

**Supplementary Figure S21:** Western blot for LOX-PP and His-tag in purified protein. **(a)** Different concentration of purified protein run in SDS-page and stained with coomassie stain. **(b)** Different concentration of purified protein was probed for LOX-PP. **(c)** Different concentration of purified protein was probed for His-tag. **This represents the full-length Gel/blots for figure 1b.**

**Supplementary Figure S22**

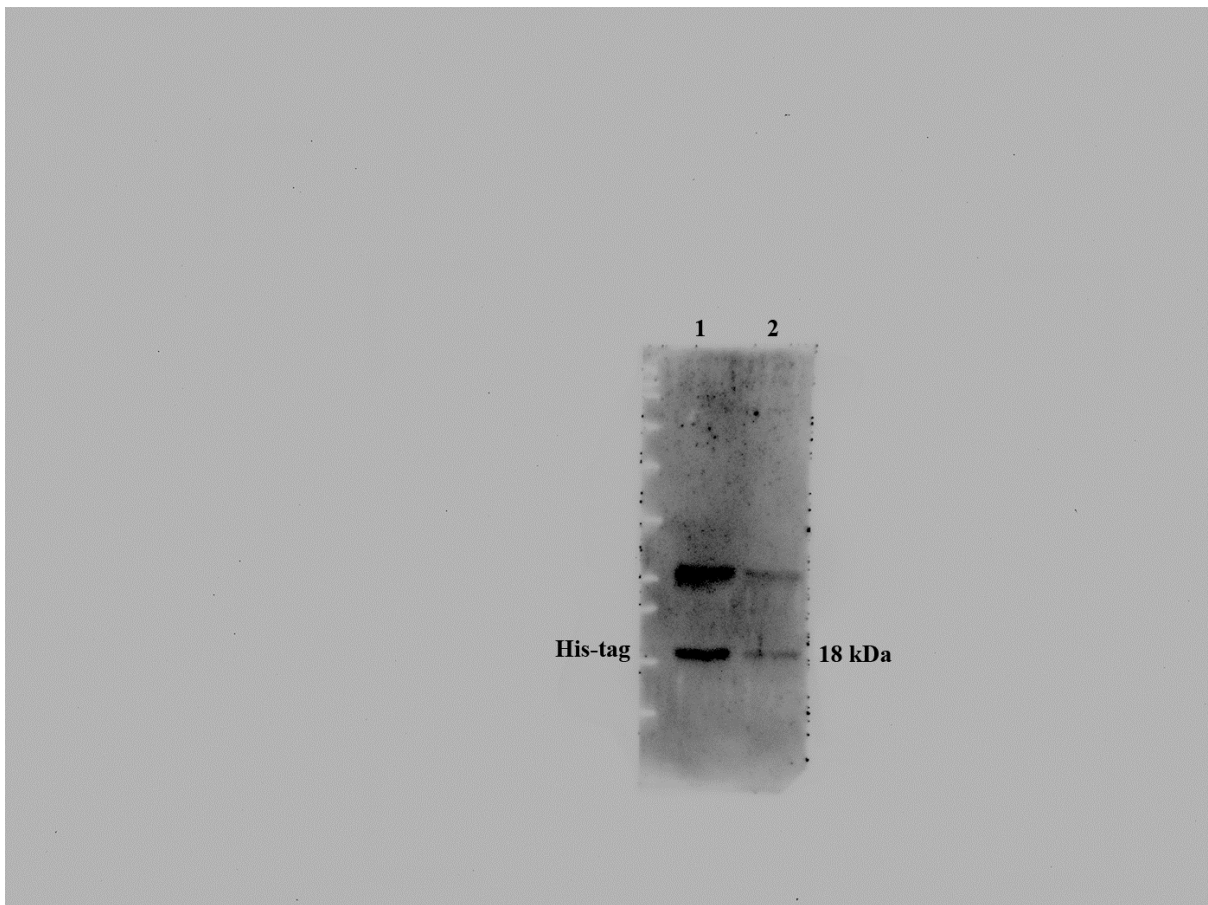

**Supplementary Figure S22:** Western blot for His-tag of the purified protein after His-tag cleavage using factor Xa protease (Lane-1: His-tag uncleaved, Lane-2: His-tag cleaved). **This represents the full-length blot for figure 1c.**

**Supplementary Figure S23**

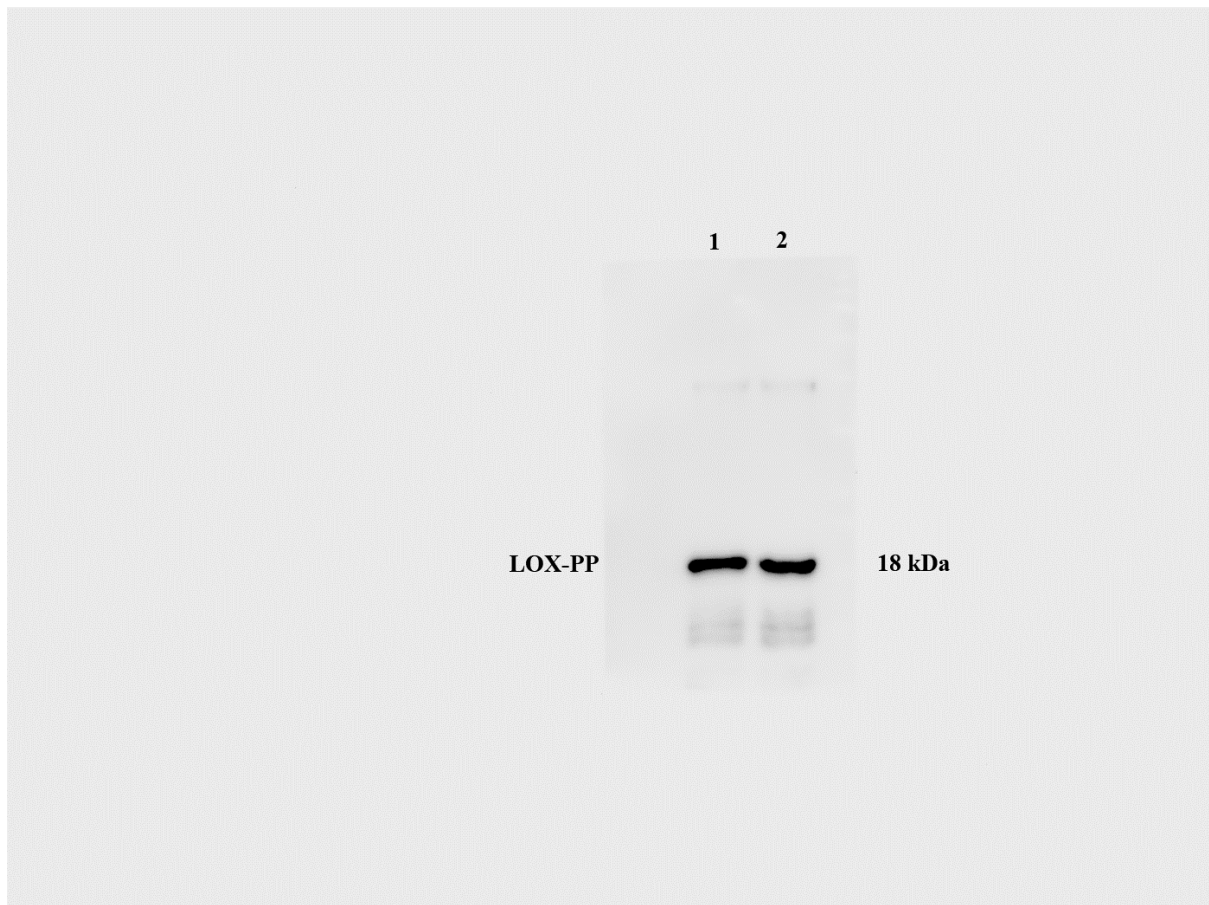

**Supplementary Figure S23:** Western blot for LOX-PP of the purified protein after His-tag cleavage using factor Xa protease (Lane-1: His-tag uncleaved, Lane-2: His-tag cleaved). **This represents the full-length blot for figure 1c.**
